# Supplementary material for: Phosphodiesterase Type-5 Inhibitor Tadalafil Modulates Steroid Hormones Signaling in a Prostate Cancer Cell Line
Source: MDPI journal article supplement (doi:10.3390/ijms22020754), 2021-01-13
Supplement: s1 [file s1]

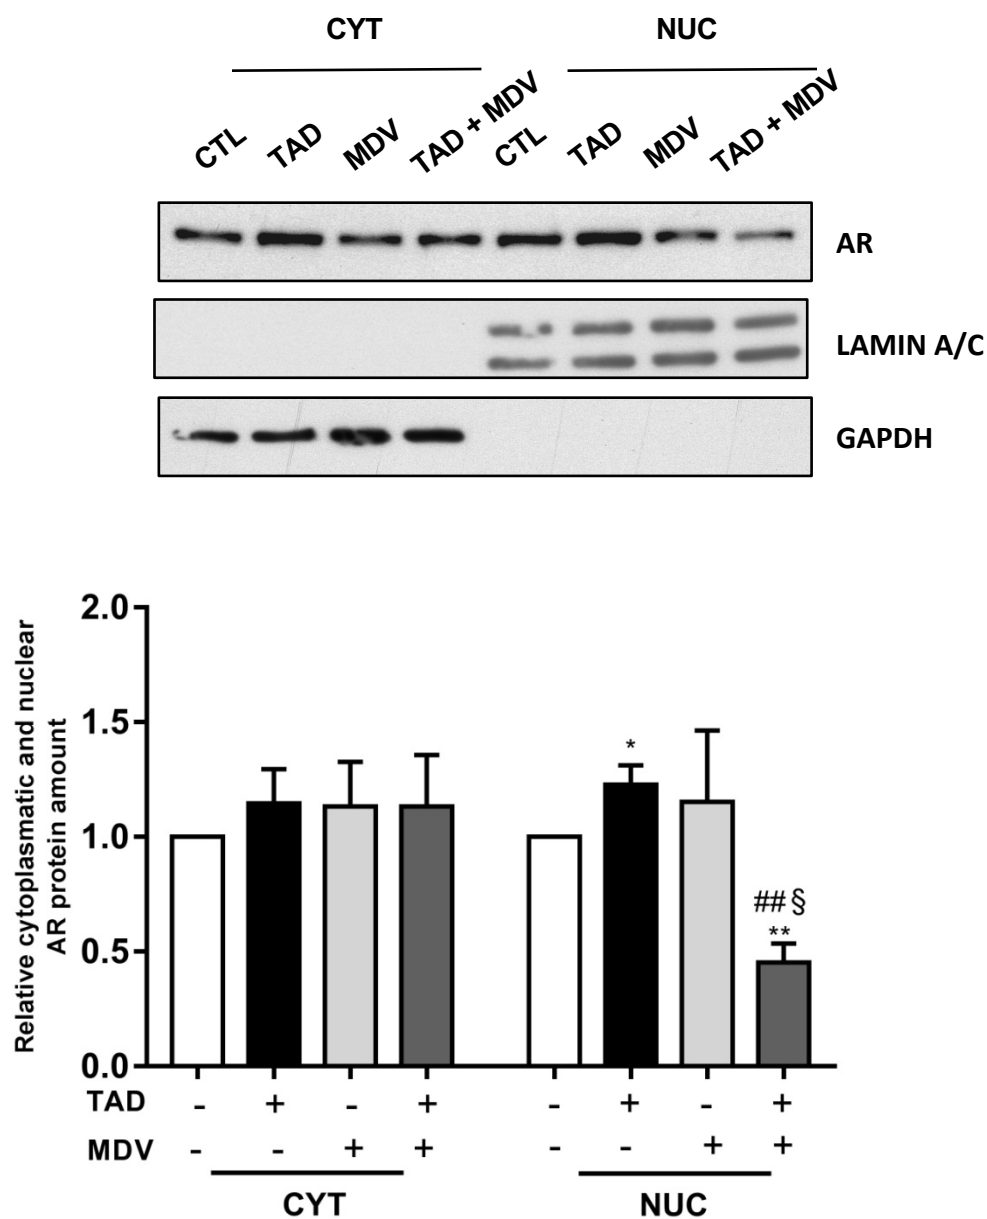

**Figure S1.** Effect of TAD on AR translocation. Representative Western blot analysis of AR protein expression in androgen-sensitive cell line LNCaP cultured in the presence (+) or in the absence (-) of TAD ( $10^{-6}$  M) and MDV3100 (MDV  $10^{-5}$  M). Cells treated with MDV for 2 h by addition of TAD for 15 min. GAPDH and Lamin A/C were used as loading and purity controls of each cellular fraction. Results are represented as mean  $\pm$  SE (n=3) of three independent experiments. \*  $p < 0.05$ , \*\*  $p < 0.005$  vs CTL cells, ##  $p < 0.005$  vs TAD treated cells, §  $p < 0.05$  vs MDV treated cells.

**A**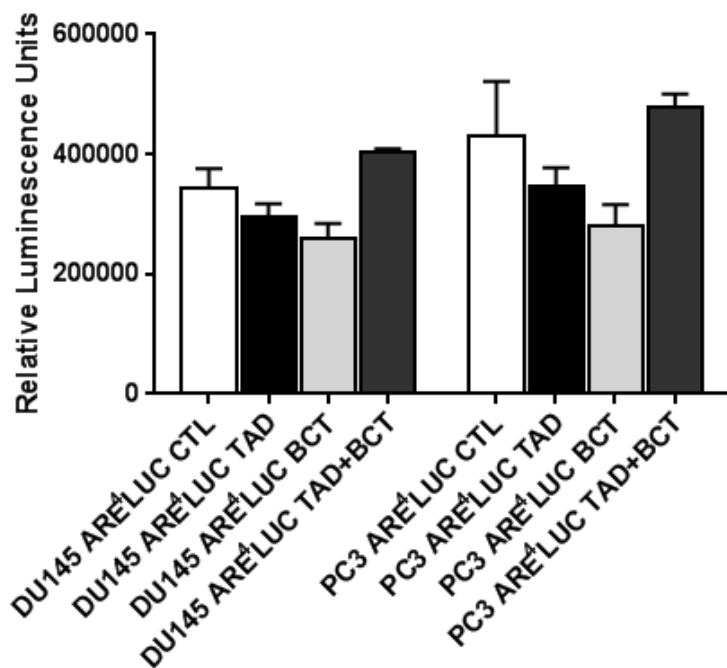**B**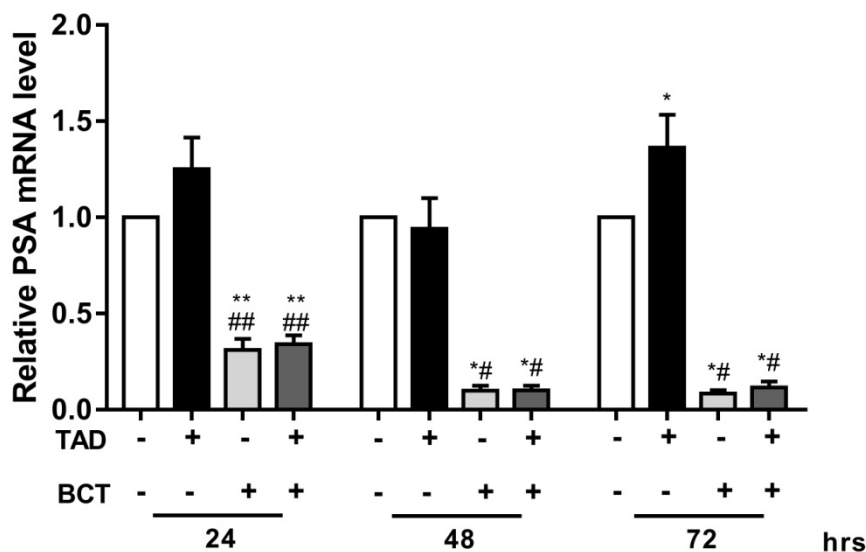

**Figure S2.** Effect of TAD on AR transcriptional activity in Prostatic cancer cells lines. **(A)** DU145 and PC3 were transfected with ARE<sup>4</sup>LUC and treated in the presence (+) or in the absence (-) of TAD ( $10^{-6}$  M) and BCT ( $10^{-4}$  M). Luciferase activity was measured after 24 h. **(B)** Analysis of the AR-dependent genes PSA in LNCaP cells cultured treated in the presence (+) or in the absence (-) of TAD ( $10^{-6}$  M) and BCT ( $10^{-4}$  M). Results are represented as mean  $\pm$  SE (n=3) of three independent experiments. \*  $p < 0.05$ , \*\*\*  $p < 0.001$  vs CTL cells, #  $p < 0.05$ , ##  $p < 0.005$ , vs TAD treated cells treated cells.
